# Supplementary material for: Distribution and Risk Assessment of Polychlorinated Biphenyls in Soil and Plants in Koko Town, Delta State, Nigeria
Source: Research Square preprint supplement (doi:10.21203/rs.3.rs-7066469/v1), 2025-07-22
Supplement: Supplementary file 1 [file af7b97fbb896b875f64eaee1.xlsx]

## Sheet: Sheet1
					Identified plants	Parameters S/NO	PCBs (ppb)
				Locations			PCB-8		PCB-18		PCB-28		PCB-44		PCB-52		PCB-66		PCB-77		PCB-81		PCB-101		PCB-105		PCB-114		PCB-118		PCB-123		PCB-126		PCB-128		PCB-138		PCB-153		PCB-156		PCB-157		PCB-167		PCB-169		PCB-170
							soil	plant	soil	plant	soil	plant	soil	plant	soil	plant	soil	plant	soil	plant	soil	plant	soil	plant	soil	plant	soil	plant	soil	plant	soil	plant	soil	plant	soil	plant	soil	plant	soil	plant	soil	plant	soil	plant	soil	plant	soil	plant	soil
				KOKO SEAPORT	Ceiba Pentandra	1	N.D	17.44	N.D	6.8	N.D	1.41	N.D	9.3	N.D	7.42	0.56	60.99	N.D	3.97	N.D	10.88	0.47	6.26	0.57	7.32	0.45	28.23	N.D	10.09	0.2	1.08	0.3	9.83	N.D	0.51	N.D	1.48	0.67	1.14	N.D	0.6	N.D	0.79	N.D	15.86	1.05	150.74	1.57
				TOTAL BLENDING PLANT	Pueraria montana	2	N.D	28.1	N.D	11.87	N.D	2.39	N.D	15.51	N.D	13.75	1.21	99.91	0.21	1.85	0.2	19.98	N.D	10.46	N.D	13.63	0.2	5.42	N.D	17.33	N.D	17.98	N.D	17.02	N.D	2.5	N.D	6.62	0.93	39.11	N.D	1.6	N.D	7.45	N.D	3.76	N.D	7.96	N.D
				EBENCO NIGERIA LTD	Vernonia amygdalina	3	1.05	25.43	1.28	9.28	N.D	2.04	3.75	13.08	4.67	10.81	14.98	112.02	1.36	19.26	3.18	15.95	3.22	9.23	2.25	10.83	1.56	40.49	37.14	14.69	7.54	1.8	0.99	14.03	1.25	0.68	3.01	1.93	5.4	8.28	0.69	0.9	4.47	1.08	N.D	N.D.	4.4	3.31	3.56
				TAURUS OIL AND GAS	Musa	4	11.66	15.82	19.96	5.45	3.94	0.69	27.53	7.72	29.05	4.81	68.31	50.22	9.66	8.61	14.38	9.28	6.11	5.04	35.95	6.11	11.19	23.57	29.91	8.38	20.65	9.36	32.45	7.91	5.31	1.65	4.84	1.15	4.03	5.39	3.15	0.56	2.47	0.76	N.D	N.D.	12.81	2.76	6.87
				BITUMEN NIG. LTD	Chromolaena odorata	5	29.87	46.6	10.11	11.65	2.42	2.26	15.55	13.91	13.29	124.48	104.02	260.46	6.51	70.06	16.88	24.19	10.71	16.05	12.82	18.89	49.07	46.49	16.89	14.69	N.D	5.12	15.51	13.67	2.68	1.15	2.42	2.35	10.55	11.92	1.04	1.09	0.89	2.02	N.D	3.25	4.11	3.83	2.55
[truncated: 13 more columns]
